1 Phages actively challenge niche communities in the Antarctic  
2 soils

3

4 Oliver K.I. Bezuidt<sup>a\*</sup>, Pedro Humberto Lebre<sup>a\*</sup>, Rian Pierneef<sup>f<sup>a,b</sup></sup>, Carlos León-  
5 Sobrino<sup>a</sup>, Evelien M. Adriaenssens<sup>c</sup>, Don A. Cowan<sup>a</sup>, Yves Van de Peer<sup>a,d,e</sup> and  
6 Thulani P. Makhalanyane<sup>a#</sup>

7

8 <sup>a</sup>Centre for Microbial Ecology and Genomics, Department of Biochemistry, Genetics  
9 and Microbiology, University of Pretoria, Lynnwood Road, Pretoria, 0028, South  
10 Africa, <sup>b</sup> Biotechnology Platform, Agricultural Research Council, Pretoria, 0002, South  
11 Africa, <sup>c</sup> Quadram Institute Bioscience, Norwich Research Park, NR4 7HQ Norwich,  
12 United Kingdom, <sup>d</sup>Department of Plant Biotechnology and Bioinformatics, Ghent  
13 University, 9052 Ghent, Belgium, <sup>e</sup>Center for Plant Systems Biology, VIB, 9052  
14 Ghent, Belgium

15

16 Running Head: host-phage interactions in Antarctica

17

18 Oliver K.I. Bezuidt and Pedro H Lebre contributed equally to this work. Author order  
19 was determined on the basis of seniority.

20

21 #Address correspondence to Thulani P. Makhalanyane,

22 [thulani.makhalanyane@up.ac.za](mailto:thulani.makhalanyane@up.ac.za)

23

24 **Abstract**

25 By modulating the structure, diversity and trophic outputs of microbial communities,  
26 phages play crucial roles in many biomes. In oligotrophic polar deserts, the effects of  
27 katabatic winds, constrained nutrients and low water availability are known to limit  
28 microbial activity. Although phages may substantially govern trophic interactions in  
29 cold deserts, relatively little is known regarding the precise ecological mechanisms.  
30 Here, we provide the first evidence of widespread antiphage innate immunity in  
31 Antarctic environments using metagenomic sequence data from hypolith  
32 communities as model systems. In particular, immunity systems such as DISARM  
33 and BREX are shown to be dominant systems in these communities. Additionally, we  
34 show a direct correlation between the CRISPR-cas adaptive immunity and the  
35 metavirome of hypolith communities, suggesting the existence of dynamic host-  
36 phage interactions. In addition to providing the first exploration of immune systems in  
37 cold deserts, our results suggest that phages actively challenge niche communities  
38 in Antarctic polar deserts. We provide evidence suggesting that the regulatory role  
39 played by phages in this system is an important determinant of bacterial host  
40 interactions in this environment.

41

42 **Importance**

43 In Antarctic environments, the combination of both abiotic and biotic stressors results  
44 in simple trophic levels dominated by microbiomes. Although the past two decades  
45 have revealed substantial insights regarding the diversity and structure of  
46 microbiomes, we lack mechanistic insights regarding community interactions and  
47 how phages may affect these. By providing the first evidence of widespread  
48 antiphage innate immunity, we shed light on phage-host dynamics in Antarctic niche  
49 communities. Our analyses reveal several antiphage defense systems including  
50 DISARM and BREX, which appear to dominate in cold desert niche communities. In  
51 contrast, our analyses revealed that genes, which encode antiphage adaptive  
52 immunity were under-represented in these communities suggesting lower infection  
53 frequencies in cold edaphic environments. We propose that by actively challenging  
54 niche communities, phages play crucial roles in the diversification of Antarctic  
55 communities.

56

57

## 58 **Introduction**

59 Antarctic terrestrial environments including open soils, permafrost and the  
60 surface and interior of rocks, are typically oligotrophic and dominated by  
61 psychrophilic and psychrotolerant microbial communities (1-4). It has been  
62 suggested that the extreme abiotic pressures of the environment such as  
63 temperature, desiccation stress and UV radiation are dominant drivers of both the  
64 diversity and function of cold-adapted bacterial communities in terrestrial polar  
65 deserts (5-7). Similarly, biotic interactions such as competition, symbioses, horizontal  
66 gene transfer (HGT) and predation have also been shown to play a role in the  
67 distribution and diversity of microbial communities in these soil ecosystems (8-10).  
68 The presence of viruses, including bacteriophages, in these cold hyper-arid desert  
69 soils potentially adds an additional layer of complexity to the microbial system, but  
70 the extent to which phage-host interactions play a role in shaping community  
71 compositions and processes in cold desert soil niches remains a matter of  
72 speculation (11, 12).

73 Antarctic desert hypolithic communities, in particular, have been shown to  
74 contain substantial viral populations, dominated by tailed bacteriophages of the order  
75 *Caudovirales* (11, 13-15). Micro-array analysis of lithic niches identified an even  
76 greater phage diversity, including signatures of RNA bacteriophages of the family  
77 *Leviviridae*, ssDNA phage of the family *Microviridae* and non-tailed dsDNA  
78 tectiviruses (16). Together, these observations suggest that phages may play an  
79 important role of in microbial community structures and functions.

80 The presence of active bacteriophages in a microbial community inevitably  
81 leads to the evolution of specialized bacterial defensive measures (17), and a  
82 diverse range of bacterial defense mechanisms against parasitic phages have been

83 identified (18, 19). These include adaptive immunity elements, such as the CRISPR-  
84 Cas systems, and innate immunity mechanisms, such as restriction-modification  
85 (RM) and toxin-antitoxin abortive infection (Abi) systems (18). Recent pangenomics  
86 studies have also identified novel defense systems that are widely distributed across  
87 bacterial taxa and are thought to play a role in anti-phage resistance (20-23). These  
88 include the bacteriophage exclusion (BREX) system, coded by a 4-8 gene cluster,  
89 that provides resistance to *Siphoviridae* and *Myoviridae* tailed phages by inhibition of  
90 phage DNA replication (21), and other less well characterized systems such as the  
91 Thoeris, Shedu and Gabija elements that increase bacterial host resistance to  
92 specific groups of phages (22).

93 Combining the valuable evidence on phage diversity and prevalence in polar  
94 desert soils, we hypothesize that phage-host interactions play an important role in  
95 shaping the structure of edaphic microbial communities in these environments. To  
96 test our hypothesis, we assess the known bacterial defense systems in  
97 metagenomic sequence data derived from niche Antarctic hypolith community. We  
98 were able to link some of these data to specific phage genomes and propose that  
99 phages play an active role in shaping the immunity of Antarctic soil microbial  
100 communities.

101

## 102 **Results**

### 103 **The distribution of anti-phage defense mechanisms shows an abundance of** 104 **innate immunity genes**

105 The distribution of antiphage defense systems in the metagenome was  
106 determined by mapping defense genes against the taxonomically assigned contigs.  
107 In total, 24,941 defense genes were detected, comprising 1.2% of the entire

108 metagenome gene count. Approximately 40% of these were found in contigs  
109 attributed to unknown phyla. The general distribution of defense genes across known  
110 phyla was consistent with the relative abundance of each phylum in the metagenome  
111 (Figure 1A, Table S4). Proteobacteria harbored the highest number of anti-phage  
112 genes (5289 genes, 1.1% of total gene count for this phylum), followed by  
113 Actinobacteria (3808, 0.9% total gene count) and Bacteroidetes (2128, 1.08% of total  
114 contig count). RM, DISARM and BREX systems were the most abundant systems in  
115 the metagenome, contributing 67.6% of the total gene hits for anti-phage defense  
116 systems. On the other side of the spectrum, the defense systems Shedu, Hachiman  
117 and CRISPR-type 2 were present at relatively low abundances, and therefore had  
118 little apparent contribution to the global defense system distribution. The average  
119 contribution of defense genes to the total gene count per phyla was 1.8%, with  
120 Deferribacteres and Candidatus Tectomicrobia as outliers. However, it is important  
121 to note that these phyla represent a very small portion of the metagenome, and  
122 therefore the possibility that the high percentage of defense genes is biased toward  
123 the low gene count for these phyla cannot be disregarded.

124         Analysis of the relative contribution of each defense system within each  
125 phylum also showed that genes belonging to the RM, DISARM, and BREX systems  
126 were the main contributors across the majority of phyla (Figure 1B). The recently  
127 discovered Zorya system was predominantly represented in the phyla  
128 Gemmatimonadetes, Bacteroidetes, Planctomycetes, Proteobacteria and  
129 Verrumicrobia, while CRISPR systems showed the highest contribution in  
130 Cyanobacteria and Euryarchaeota. Interestingly, non-canonical anti-phage systems  
131 represented more than 50% of the defense systems identified for all phyla aside from

132 Euryarchaeota, with Verrucomicrobia, Planctomycetes and Acidobacteria possessing  
133 the highest distribution of non-canonical defense genes.

134

### 135 **Innate immunity is dominated by BREX and DISARM genes**

136 As highlighted above, anti-phage systems across phyla in the hypolith  
137 metagenome were dominated by non-canonical innate systems. Further analysis of  
138 the distribution of defense genes revealed that anti-phage systems in the majority of  
139 phyla were dominated by BREX and DISARM genes. The two systems together  
140 accounted for 33.4% of defense genes, compared to 31.7% genes belonging to  
141 canonical RM systems.

142 A total of 3758 genes for the DISARM system were identified. These included  
143 the Class I marker gene *drmD* (449 counts, 11.9% of DISARM genes), which  
144 encodes the SNF2-like helicase (23), as well as the Class II marker gene *drmA*  
145 (1020, 17.1% of DISARM genes), which encodes a protein with a putative helicase  
146 domain (23). Similarly, a total of 4598 genes representing all BREX types were  
147 identified in the metagenome. Interestingly, the most abundant gene from this  
148 system found in the metagenome, *pgW* (2640, 57.4% of BREX genes), which codes  
149 for a serine/threonine kinase, is specific to the type 2 BREX system, also called the  
150 Pgl system (21). By comparison, of the 7908 RM genes found in the metagenome,  
151 the most abundant is *hsdM* (1423, 18% of RM genes), a type I DNA methylase  
152 responsible for the protection of host DNA (24). In fact, more than 50% of RM  
153 defense genes were attributed to type I RM systems.

154 The third non-canonical system representing more than 10% of the anti-phage  
155 defense systems in a subset of the phyla, the Zorya system, included a total of 2411  
156 genes in the metagenome. The majority of these were homologous to the two genes

157 that make up a proton channel, *zorA* and *zorB*. This is a common feature in all types  
158 of Zorya system and is thought to cause depolarization of the membrane upon  
159 infection (22).

160

## 161 **Type I CRISPR-Cas genes comprise the bulk of anti-phage adaptive immunity** 162 **genes**

163 In total, 2234 CRISPR-cas genes were identified in 1601 contigs by searching  
164 for shared sequence similarities against the CDD database. A substantial proportion  
165 of all classified CRISPR-cas loci (71.4%) belonged to type I CRISPR-Cas systems,  
166 followed by type III (18.5%) and type II (10.2%) (Table S5). While the abundance of  
167 Cas I-B loci sequences in the public databases suggests that the Cas-I mechanism  
168 is the most common in both bacteria and archaea (20 and 30% of total CRISPR loci  
169 (25), less than 3% of these loci were present in our composite metagenome (Table  
170 S5, Figure 2). Surprisingly, CRISPR-cas loci linked to Types I-C and I-E were the  
171 most prevalent, at 24.1% and 12.9% of classified CRISPR-cas loci, respectively.  
172 Another subtype identified at higher relative abundances than previously reported  
173 (25) was I-U, at 10.76% of classified *cas* loci. This subtype is characterized by the  
174 marker GSU0054 domain, which was the fourth most abundant *cas* CDD overall  
175 (108 occurrences) after *cas4*, *cas1*, and *cas2*.

## 176 **Phage presence in the niche community is correlated with the CRISPR arrays**

177 CRISPR arrays represent the history of infection by invading DNA (e.g.  
178 phages, plasmids (26, 27), and a study of their composition and frequencies  
179 provides insights into phage-host interactions in an ecological context (28). A total of  
180 878 CRISPR arrays harboring 10,292 spacers were identified in the metagenome,  
181 with an average length of 36 protospacers per array (Figure S1A). CRISPR array



182 sizes ranged from 2 to 249, with the majority (83.5% of total arrays) falling between 2  
183 and 18 protospacers per array (Figure S1B).

184 The distribution of CRISPR array sizes in the metagenome was compared to  
185 data collected from a ground-water microbiome (29), to compare the array size  
186 distributions from environments with potentially different phage-host dynamics (11).  
187 The results show that CRISPR arrays in the hypolith metagenome exhibited a  
188 smaller and narrower size range, compared to the ground-water community  
189 metagenome (Figure 3). This suggests the existence of distinct phage infection  
190 frequencies between the different environments; i.e., lower infection frequencies in  
191 the cold edaphic community.

192 In addition to using the CRISPR array as a tool for understanding infection  
193 history, the viral population in the Antarctic soil community was also assessed by  
194 assembly of the metavirome. A total of 793 contigs was assembled from the  
195 metagenomic sequence data using VirSorter (30). Taxonomic annotation of these  
196 contigs, using a database of viral reference genomes (31), unambiguously assigned  
197 645 of these as viral, 560 of which were further assigned to the order of tailed  
198 phages *Caudovirales*. Within this order, the majority of contigs were assigned to  
199 Siphoviridae (52%), followed by unclassified *Caudovirales* (14%), and viruses with  
200 no assigned family (13%) (Figure S2). To access the correlation between the viral  
201 contigs and the CRISPR arrays, spacers from the metagenome were matched to  
202 both the VirSorter contigs and a set of contigs from environmental datasets (IMG/VR  
203 (32), which allowed for the taxonomic assignment of 394 (3.8% of total number of  
204 spacers) CRISPR-cas spacers (Figure S3). The resulting similarity network (Figure  
205 4) showed that all 73 VirSorter phage contigs included in the network (red nodes)  
206 matched to CRISPR-cas spacers (grey nodes), suggesting that a substantial fraction

207 (11.3%) of the identified viral population had a history of infection *in situ* in the host  
208 population, and may therefore be actively involved in shaping the adaptive immunity  
209 of the microbial community. In addition, several distinct clusters showed matches  
210 between a single VirSorter contig and several spacers, suggesting these viral contigs  
211 are common infection agents.

212 Functional analysis using eggNOG showed the presence of genes that  
213 facilitate infection such as genes that code for chitinases, which are involved in the  
214 degradation of the protective biofilm (33), as well as a AntA/AntB antirepressor  
215 gene, thought to be involved in phage anti-immunity (34) (Figure 5). In addition, the  
216 eggNOG functional analysis of the 645 VirSorter viral contigs also revealed the  
217 presence of genes contributing to phage virulence (Table S2), the most abundant of  
218 which encode for methyltransferases, which are actively involved in the evasion of  
219 the R.M systems (35). This result suggests the possibility of an evolutionary pressure  
220 for the phages to develop evasion mechanisms against their hosts, which further  
221 hints at active phage-host dynamics in these long-enduring Antarctic hypoliths.

222

## 223 **Discussion**

224 Due to the relatively simple trophic structures in cold desert systems,  
225 including Antarctic soils, cryptic microbial communities are considered to be  
226 important drivers of local ecosystem services (36). However, the extent to which  
227 these communities are influenced by phages remains largely unexplored. Such  
228 interactions may shape the diversification and community interactions in cold desert  
229 systems. Qualitative surveys of Antarctic metaviromics have reported a high diversity  
230 of viruses associated with microbial communities of open soils, and cryptic niches  
231 (12, 13). Evidence, albeit limited, that Antarctic soil phages exist predominantly in a

232 lysogenic rather than lytic lifestyle (14), has led to suggestions that the functional role  
233 of phages in this spatially restricted, water-constrained desert soil niche may be  
234 limited (11).

235         The results presented in this study provide the first evidence of interaction  
236 between phage and hosts in this psychrophilic edaphic environment. This is most  
237 evident in the correlation between the metavirome of the hypolith community and the  
238 CRISPR-arrays, which suggest the active evolution of the adaptive immune system  
239 against local viral threats. This idea of community adaption to local phage threat is  
240 further implied by the positive correlation between the CRISPR arrays and viruses  
241 extracted from local soils. In fact, a previous study (37) has already suggested that  
242 recruitment from surrounding soils plays an important role in the development of  
243 hypoliths, and this might also be extended to the recruitment of phages from the  
244 surrounding ecosystem. Another indication of active interaction between phage and  
245 host is suggested by the presence of several methyltransferases in the  
246 metagenome-assembled viral contigs, which are a hallmark of viral evasion against  
247 native host RM systems (31, 35). Other genes found in this virome contigs include  
248 genes specifically involved in the degradation of biofilm matrices and evasion against  
249 RM systems, further suggesting that there is a complex network of interactions at  
250 play between phages and their hosts in the hypolithic environment.

251

252         While the metagenomics data analysed in this study does not give a direct  
253 indication of the temporal scale of the phage-host interactions occurring in the  
254 hypolith, the short sizes of CRISPR-array sizes in the hypolith metagenome suggest  
255 a low frequency of infection. This low frequency is further hinted at when comparing  
256 the hypolith CRISPR-array sizes with those of a more fluid and homogenous

257 environment, where viral-host interactions are assumed to be a frequent occurrence  
258 (29). Together, these results imply a model for viral-host interactions in hypoliths  
259 that follows the 'static-step-static' development model suggested by Pointing et al.  
260 (38), driven by the stochastic and intermittent nature of rain events in such water-  
261 limited ecosystems. A surprising result from this study is the prevalence of non-  
262 canonical innate immunity systems, the most prominent of which are the BREX and  
263 DISARM systems. While these two systems have been shown to be widespread in  
264 bacteria using a pan-genomic dataset (21, 23), the present study represent the first  
265 evidence for the prevalence of these systems in ecological samples. As such, this  
266 result implies that non-canonical innate immunity is more important for anti-phage  
267 microbial community defense than previously thought and should therefore be the  
268 focus for future studies into innate immunity in the ecological context. There are also  
269 indications from the hypolith metagenome that the prevalence of non-canonical  
270 innate immunity over traditional RM and Abi system for defense against phages is  
271 related to the adaptation of the hypolith communities to specific local viral  
272 populations. For instance, the Zorya system, the third most prevalent non-canonical  
273 immunity system in the metagenome, is hypothesized to operate similarly to the Abi  
274 system (22). In turn, Zorya systems provide resistance against a limited range of  
275 phages, including the ssDNA family *Microviridae* (22), which has been shown to be  
276 prevalent in Antarctic aquatic and soil niches (39).

277

## 278 **Conclusion**

279 Together, these results are not consistent with the suggestion that the  
280 constraints of the environment, such as low temperatures, low  $a_w$  and resulting very  
281 limited capacity for inter-particle diffusion, lead to extremely localized phage-host

282 interactions (11). Rather, the data are suggestive of a dynamic and continual  
283 interaction between host and phage. Nevertheless, inter-particle communication and  
284 exchange may be limited to brief periods when bulk liquid water is present, after  
285 snow melt, for example. Furthermore, the low metabolic rates (the inevitable  
286 consequence of Arrhenius effects (temperature dependence of reaction rates) in cold  
287 environments) should also limit the rates at which phages can replicate and  
288 propagate, further limiting the frequency of interactions with their hosts (40). We  
289 suggest that the localized nature of host-phage interactions in the hypolith niche and  
290 the limited inter-particle communication, where bacterial hosts are not frequently  
291 challenged by novel phage threats, leads to a reliance of microbial communities on  
292 innate immunity as the primary defense against phage infection. The smaller sizes of  
293 CRISPR arrays in the Antarctic soil metagenome sequences compared to those from  
294 a temperate aquatic environment, and the under-representation of CRISPR systems,  
295 give further credence to the temporally sporadic interaction between phages and  
296 their hosts. Nevertheless, the correlation between the metavirome and the CRISPR-  
297 cas arrays, together with the presence of bacteriophage evasion genes in the  
298 metavirome, suggest that phage-host interactions within the hypolith community are  
299 a dynamic process that leads to co-evolution of both phages and hosts. We therefore  
300 suggest that phages play a hitherto underestimated role in driving the evolution of  
301 Antarctic soil microbial communities by shaping their collective immunity.

302

## 303 **Materials and Methods**

### 304 **Sample collection, DNA extraction and metagenomic sequencing**

305 The sample collection, DNA extraction and metagenomic sequencing  
306 protocols used in this study have been described previously (41). Briefly, a total of 50  
307 samples were collected from hypolithic niches in the Antarctica Miers Valley (GPS  
308 78°09'36.0"S 164°06'00.0"E) and stored in sterile Whirl-Pak bags (Nasco  
309 International, Fort Atkinson, WI, USA) at -20 °C. Metagenomic DNA was extracted  
310 from each sample using a PowerSoil DNA isolation kit (MO BIO, Carlsbad, CA,  
311 USA), and the purified DNA was pooled before further processing. Purified DNA was  
312 sheared into fragments of approximately 300 bps and further purified from 1%  
313 agarose gels. Subsequent sequencing was performed using Illumina HiSeq-2000  
314 paired-end technology (2 x 101 bp), and the resulting reads were trimmed and  
315 assembled as described below.

316

### 317 **Metagenome assembly and taxonomical annotation**

318 Metagenomic DNA sequence data were quality-filtered by trimmomatic  
319 version 0.36 using a phred cut-off > 30 (42). The assembly of high-quality reads from  
320 the metagenome sequence dataset was conducted using the IDBA-UD tool (43) and  
321 contig lengths were extended (scaffolded) using SSPACE Basic (43). The statistics  
322 for the assembly of the metagenome are presented in Table S1. Contigs were  
323 taxonomically assigned using the MEGAN v6 pipeline (44) with the NCBI taxonomy  
324 database for taxon ID assignment.

325

### 326 **Detection of the innate and adaptive defense systems**

327 Metagenomic contigs were used for functional gene predictions using prodigal  
328 v2.50, with the `-meta` parameter implementation (45). Predicted genes were  
329 subsequently screened for domain similarity with known defense systems against

330 the conserved domain database (CDD) of clusters of orthologous groups (COGs)  
331 and protein families (Pfam) using rps-blast (E value < 1e-02) (33). These results  
332 were manually filtered for the identification of phage-specific defense systems, which  
333 include restriction-modification (R.M), bacteriophage exclusion (BREX), abortive  
334 infection (Abi), defense island system associated with restriction-modification  
335 (DISARM), and other recently identified systems using a refined list of COG and  
336 Pfam position-specific score matrices (PSSMs) for marker genes in these systems  
337 (21-23, 46). A list of the marker genes used in this study can be found in Table S2.  
338 Additionally, defense genes that could not be clustered into a specific system were  
339 classified as ambiguous as were not considered for subsequent analysis (Table S3).

340 ORFs predicted using prodigal v2.50 were queried against the CDD database  
341 for the presence of putative CRISPR-cas genes (47), using delta-blast at a cutoff E  
342 value of 1e-03. Multi-gene cas modules were identified as those having multiple cas  
343 annotated genes with  $\leq 5$  ORF spacings. Type and subtype classifications were  
344 assigned following the updated classification set by Makarova et al. (25).

345

### 346 **Phage genome identification and CRISPR spacer matching**

347 Antarctic hypolith phage genomes were identified from the assembled  
348 metagenome using VirSorter (30) on the iVirus platform hosted by Cyverse (48),  
349 using the virome database and the microbial decontamination option. Only  
350 predictions of categories 1, 2, 4 and 5 were used (phages and prophages identified  
351 with the “pretty sure” and “quite sure” qualification). Additional phage environmental  
352 phage contigs were downloaded from the IMG/VR database version 2018-07-01\_4  
353 (32) and used for the network construction. Taxonomic assignment of assembled  
354 contigs was performed by using the DIAMOND blastx function with a viral database



355 downloaded from the NCBI Viral Genomes Resource and e-value set to 1e-5. ORFs  
356 of VirSorter contigs were predicted using Prodigal v2.50 (31, 49) with the virus  
357 genomes setting and annotated using eggNOG-mapper v1 (50) with the DIAMOND  
358 option and the EggNOG v4.5.1 database (51). Annotation were visualized with the  
359 ApE v2.0.55 plasmid editor (<http://jorgensen.biology.utah.edu/wayned/apel/>).

360 The CRISPR recognition tool (CRT) v1.2 was used with the default settings to  
361 search for CRISPR arrays in the hypolith metagenome (52). The identified spacers in  
362 the arrays were matched with the VirSorter phage database and the IMG/VR  
363 database using blastn of the BLAST+ suite with the following parameters: -  
364 qcov\_hsp\_perc 80 -task blastn -dust no -soft\_masking false (53). Spacer matches of  
365 > 90% sequence identity for the VirSorter genomes and >95% identity for the  
366 IMG/VR genomes were exported and visualized as a network in Cytoscape (54),  
367 where the nodes are spacers (grey) or genomes (blue = IMG/VR; red = VirSorter)  
368 and the edges blastn matches.

369

370



371 **Acknowledgements**

372 We are grateful to the National Research Foundation (NRF) (Grant ID  
373 118981, the South African National Antarctic Programme (SANAP 110717), and the  
374 University of Pretoria for funding. TPM also wishes to acknowledge the Fulbright  
375 Visiting Scholar Program for providing sabbatical funding. EMA gratefully  
376 acknowledges the support of the Biotechnology and Biological Sciences Research  
377 Council (BBSRC); this research was funded by the BBSRC Institute Strategic  
378 Programme Gut Microbes and Health BB/R012490/1 and its constituent project(s)  
379 BBS/E/F/000PR10353 and BBS/E/F/000PR10356

380

381 **References**

- 382 1. Makhalanyane TP, Van Goethem MW, Cowan DA. 2016. Microbial diversity and  
383 functional capacity in polar soils. *Current Opinion in Biotechnology* 38:159-166.
- 384 2. Pearce DA. 2012. Extremophiles in Antarctica: Life at low temperatures, p 87-  
385 118. *In* Stan-Lotter H, Fendrihan S (ed), *Adaption of Microbial Life to*  
386 *Environmental Extremes*. Springer Vienna.
- 387 3. Casanueva A, Tuffin M, Cary C, Cowan DA. 2010. Molecular adaptations to  
388 psychrophily: the impact of 'omic' technologies. *Trends in microbiology* 18:374-  
389 81.
- 390 4. de Scally SZ, Makhalanyane TP, Frossard A, Hogg ID, Cowan DA. 2016. Antarctic  
391 microbial communities are functionally redundant, adapted and resistant to  
392 short term temperature perturbations. *Soil Biology & Biochemistry* 103:160-170.
- 393 5. de los Rios A, Wierzechos J, Sancho LG, Ascaso C. 2004. Exploring the physiological  
394 state of continental Antarctic endolithic microorganisms by microscopy. *FEMS*  
395 *microbiology ecology* 50:143-52.
- 396 6. Yergeau E, Kowalchuk GA. 2008. Responses of Antarctic soil microbial  
397 communities and associated functions to temperature and freeze-thaw cycle  
398 frequency. *Environmental microbiology* 10:2223-35.
- 399 7. Cowan DA, Makhalanyane TP, Dennis PG, Hopkins DW. 2014. Microbial ecology  
400 and biogeochemistry of continental Antarctic soils. *Frontiers in Microbiology*  
401 5:154.
- 402 8. Hogg ID, Cary SC, Convey P, Newsham KK, O'Donnell AG, Adams BJ, Aislabie J,  
403 Frati F, Stevens MI, Wall DH. 2006. Biotic interactions in Antarctic terrestrial  
404 ecosystems: Are they a factor? *Soil biology & biochemistry* 38:3035-3040.
- 405 9. Caruso T, Hogg ID, Nielsen UN, Bottos EM, Lee CK, Hopkins DW, Cary SC, Barrett  
406 JE, Green TA, Storey BC. 2019. Nematodes in a polar desert reveal the relative  
407 role of biotic interactions in the coexistence of soil animals. *Communications*  
408 *biology* 2:63.

- 409 10. Lambrechts S, Willems A, Tahon G. 2019. Uncovering the uncultivated majority  
410 in antarctic soils: toward a synergistic approach. *Frontiers in microbiology*  
411 10:242.
- 412 11. Zablocki O, Adriaenssens EM, Cowan D. 2016. Diversity and ecology of viruses in  
413 hyperarid desert soils. *Appl Environ Microbiol* 82:770-777.
- 414 12. Adriaenssens EM, Kramer R, Van Goethem MW, Makhalanyane TP, Hogg I, Cowan  
415 DA. 2017. Environmental drivers of viral community composition in Antarctic  
416 soils identified by viromics. *Microbiome* 5.
- 417 13. Zablocki O, van Zyl L, Adriaenssens EM, Rubagotti E, Tuffin M, Cary SC, Cowan D.  
418 2014. High-level diversity of tailed phages, eukaryote-associated viruses, and  
419 virophage-like elements in the metaviromes of antarctic soils. *Appl Environ*  
420 *Microbiol* 80:6888-6897.
- 421 14. Williamson KE, Radosevich M, Smith DW, Wommack KE. 2007. Incidence of  
422 lysogeny within temperate and extreme soil environments. *Environmental*  
423 *microbiology* 9:2563-2574.
- 424 15. Wei ST, Lacap-Bugler DC, Lau MC, Caruso T, Rao S, de los Rios A, Archer SK, Chiu  
425 JM, Higgins C, Van Nostrand JD. 2016. Taxonomic and functional diversity of soil  
426 and hypolithic microbial communities in Miers Valley, McMurdo Dry Valleys,  
427 Antarctica. *Frontiers in microbiology* 7:1642.
- 428 16. Wei ST, Higgins CM, Adriaenssens EM, Cowan DA, Pointing SB. 2015. Genetic  
429 signatures indicate widespread antibiotic resistance and phage infection in  
430 microbial communities of the McMurdo Dry Valleys, East Antarctica. *Polar*  
431 *Biology* 38:919-925.
- 432 17. Gómez P, Buckling A. 2011. Bacteria-phage antagonistic coevolution in soil.  
433 *Science* 332:106-109.
- 434 18. Stern A, Sorek R. 2011. The phage - host arms race: shaping the evolution of  
435 microbes. *Bioessays* 33:43-51.
- 436 19. Koskella B, Brockhurst MA. 2014. Bacteria-phage coevolution as a driver of  
437 ecological and evolutionary processes in microbial communities. *FEMS*  
438 *microbiology reviews* 38:916-931.
- 439 20. Makarova KS, Wolf YI, Koonin EV. 2013. Comparative genomics of defense  
440 systems in archaea and bacteria. *Nucleic acids research* 41:4360-4377.
- 441 21. Goldfarb T, Sberro H, Weinstock E, Cohen O, Doron S, Charpak - Amikam Y, Afik  
442 S, Ofir G, Sorek R. 2015. BREX is a novel phage resistance system widespread in  
443 microbial genomes. *The EMBO journal* 34:169-183.
- 444 22. Doron S, Melamed S, Ofir G, Leavitt A, Lopatina A, Keren M, Amitai G, Sorek R.  
445 2018. Systematic discovery of antiphage defense systems in the microbial  
446 pangenome. *Science* 359:eaar4120.
- 447 23. Ofir G, Melamed S, Sberro H, Mukamel Z, Silverman S, Yaakov G, Doron S, Sorek R.  
448 2018. DISARM is a widespread bacterial defence system with broad anti-phage  
449 activities. *Nature microbiology* 3:90.
- 450 24. Loenen WA, Dryden DT, Raleigh EA, Wilson GG. 2013. Type I restriction enzymes  
451 and their relatives. *Nucleic acids research* 42:20-44.
- 452 25. Makarova KS, Wolf YI, Alkhnbashi OS, Costa F, Shah SA, Saunders SJ, Barrangou  
453 R, Brouns SJ, Charpentier E, Haft DH. 2015. An updated evolutionary  
454 classification of CRISPR-Cas systems. *Nature Reviews Microbiology* 13:722.
- 455 26. Datsenko KA, Pougach K, Tikhonov A, Wanner BL, Severinov K, Semenova E.  
456 2012. Molecular memory of prior infections activates the CRISPR/Cas adaptive  
457 bacterial immunity system. *Nature communications* 3:945.

- 458 27. Fineran PC, Charpentier E. 2012. Memory of viral infections by CRISPR-Cas  
459 adaptive immune systems: acquisition of new information. *Virology* 434:202-  
460 209.
- 461 28. Vale PF, Little TJ. 2010. CRISPR-mediated phage resistance and the ghost of  
462 coevolution past. *Proceedings of the Royal Society B: Biological Sciences*  
463 277:2097-2103.
- 464 29. Burstein D, Sun CL, Brown CT, Sharon I, Anantharaman K, Probst AJ, Thomas BC,  
465 Banfield JF. 2016. Major bacterial lineages are essentially devoid of CRISPR-Cas  
466 viral defence systems. *Nature communications* 7:10613.
- 467 30. Roux S, Enault F, Hurwitz BL, Sullivan MB. 2015. VirSorter: mining viral signal  
468 from microbial genomic data. *PeerJ* 3:e985.
- 469 31. Brister JR, Ako-Adjei D, Bao Y, Blinkova O. 2014. NCBI viral genomes resource.  
470 *Nucleic acids research* 43:D571-D577.
- 471 32. Paez-Espino D, Chen I-MA, Palaniappan K, Ratner A, Chu K, Szeto E, Pillay M,  
472 Huang J, Markowitz VM, Nielsen T. 2016. IMG/VR: a database of cultured and  
473 uncultured DNA Viruses and retroviruses. *Nucleic acids research*:gkw1030.
- 474 33. Altschul SF, Gish W, Miller W, Myers EW, Lipman DJ. 1990. Basic local alignment  
475 search tool. *Journal of molecular biology* 215:403-410.
- 476 34. Ravin NV, Svarchevsky AN, Dehò G. 1999. The anti - immunity system of phage -  
477 plasmid N15: identification of the antirepressor gene and its control by a small  
478 processed RNA. *Molecular microbiology* 34:980-994.
- 479 35. Labrie SJ, Samson JE, Moineau S. 2010. Bacteriophage resistance mechanisms.  
480 *Nature Reviews Microbiology* 8:317.
- 481 36. Cary SC, McDonald IR, Barrett JE, Cowan DA. 2010. On the rocks: the  
482 microbiology of Antarctic Dry Valley soils. *Nature Reviews Microbiology* 8:129-  
483 38.
- 484 37. Makhallanyane TP, Valverde A, Lacap DC, Pointing SB, Tuffin MI, Cowan DA. 2013.  
485 Evidence of species recruitment and development of hot desert hypolithic  
486 communities. *Environmental Microbiology Reports* 5:219-224.
- 487 38. Pointing SB, Warren-Rhodes KA, Lacap DC, Rhodes KL, McKay CP. 2007.  
488 Hypolithic community shifts occur as a result of liquid water availability along  
489 environmental gradients in China's hot and cold hyperarid deserts.  
490 *Environmental microbiology* 9:414-24.
- 491 39. Daniel AdC, Pedrós-Alió C, Pearce DA, Alcamí A. 2016. Composition and  
492 interactions among bacterial, microeukaryotic, and T4-like viral assemblages in  
493 lakes from both polar zones. *Frontiers in microbiology* 7:337.
- 494 40. D'Amico S, Collins T, Marx JC, Feller G, Gerday C. 2006. Psychrophilic  
495 microorganisms: challenges for life. *EMBO Rep* 7:385-389.
- 496 41. Guerrero LD, Vikram S, Makhallanyane TP, Cowan DA. 2017. Evidence of  
497 microbial rhodopsins in Antarctic Dry Valley edaphic systems. *Environmental*  
498 *Microbiology* 19:3755-3767.
- 499 42. Bolger AM, Lohse M, Usadel B. 2014. Trimmomatic: a flexible trimmer for  
500 Illumina sequence data. *Bioinformatics* 30:2114-2120.
- 501 43. Peng Y, Leung HC, Yiu S-M, Chin FY. 2012. IDBA-UD: a de novo assembler for  
502 single-cell and metagenomic sequencing data with highly uneven depth.  
503 *Bioinformatics* 28:1420-1428.
- 504 44. Boetzer M, Henkel CV, Jansen HJ, Butler D, Pirovano W. 2010. Scaffolding pre-  
505 assembled contigs using SSPACE. *Bioinformatics* 27:578-579.

- 506 45. Huson DH, Auch AF, Qi J, Schuster SC. 2007. MEGAN analysis of metagenomic  
507 data. *Genome research* 17:377-386.
- 508 46. Makarova KS, Haft DH, Barrangou R, Brouns SJ, Charpentier E, Horvath P,  
509 Moineau S, Mojica FJ, Wolf YI, Yakunin AF. 2011. Evolution and classification of  
510 the CRISPR–Cas systems. *Nature Reviews Microbiology* 9:467.
- 511 47. Marchler-Bauer A, Bo Y, Han L, He J, Lanczycki CJ, Lu S, Chitsaz F, Derbyshire MK,  
512 Geer RC, Gonzales NR. 2016. CDD/SPARCLE: functional classification of proteins  
513 via subfamily domain architectures. *Nucleic acids research* 45:D200-D203.
- 514 48. Bolduc B, Youens-Clark K, Roux S, Hurwitz BL, Sullivan MB. 2017. iVirus:  
515 facilitating new insights in viral ecology with software and community data sets  
516 imbedded in a cyberinfrastructure. *The ISME journal* 11:7.
- 517 49. Hyatt D, Chen G-L, LoCascio PF, Land ML, Larimer FW, Hauser LJ. 2010. Prodigal:  
518 prokaryotic gene recognition and translation initiation site identification. *BMC*  
519 *bioinformatics* 11:119.
- 520 50. Huerta-Cepas J, Forslund K, Coelho LP, Szklarczyk D, Jensen LJ, von Mering C,  
521 Bork P. 2017. Fast genome-wide functional annotation through orthology  
522 assignment by eggNOG-mapper. *Molecular biology and evolution* 34:2115-2122.
- 523 51. Huerta-Cepas J, Szklarczyk D, Forslund K, Cook H, Heller D, Walter MC, Rattei T,  
524 Mende DR, Sunagawa S, Kuhn M. 2015. eggNOG 4.5: a hierarchical orthology  
525 framework with improved functional annotations for eukaryotic, prokaryotic  
526 and viral sequences. *Nucleic acids research* 44:D286-D293.
- 527 52. Bland C, Ramsey TL, Sabree F, Lowe M, Brown K, Kyrpides NC, Hugenholtz P.  
528 2007. CRISPR recognition tool (CRT): a tool for automatic detection of clustered  
529 regularly interspaced palindromic repeats. *BMC bioinformatics* 8:209.
- 530 53. Camacho C, Coulouris G, Avagyan V, Ma N, Papadopoulos J, Bealer K, Madden TL.  
531 2009. BLAST+: architecture and applications. *BMC bioinformatics* 10:421.
- 532 54. Shannon P, Markiel A, Ozier O, Baliga NS, Wang JT, Ramage D, Amin N,  
533 Schwikowski B, Ideker T. 2003. Cytoscape: a software environment for  
534 integrated models of biomolecular interaction networks. *Genome research*  
535 13:2498-2504.
- 536

A

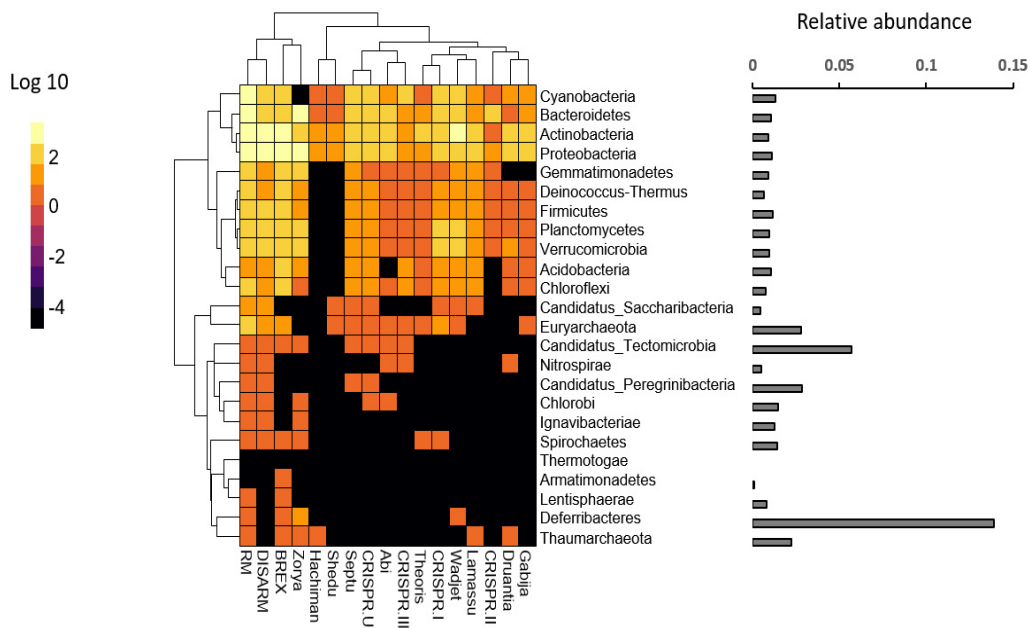

B

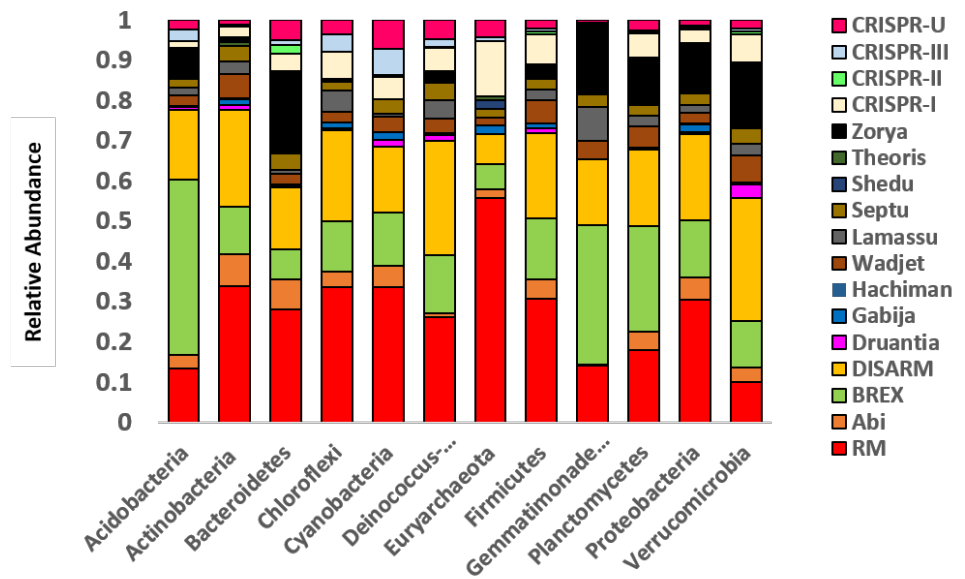

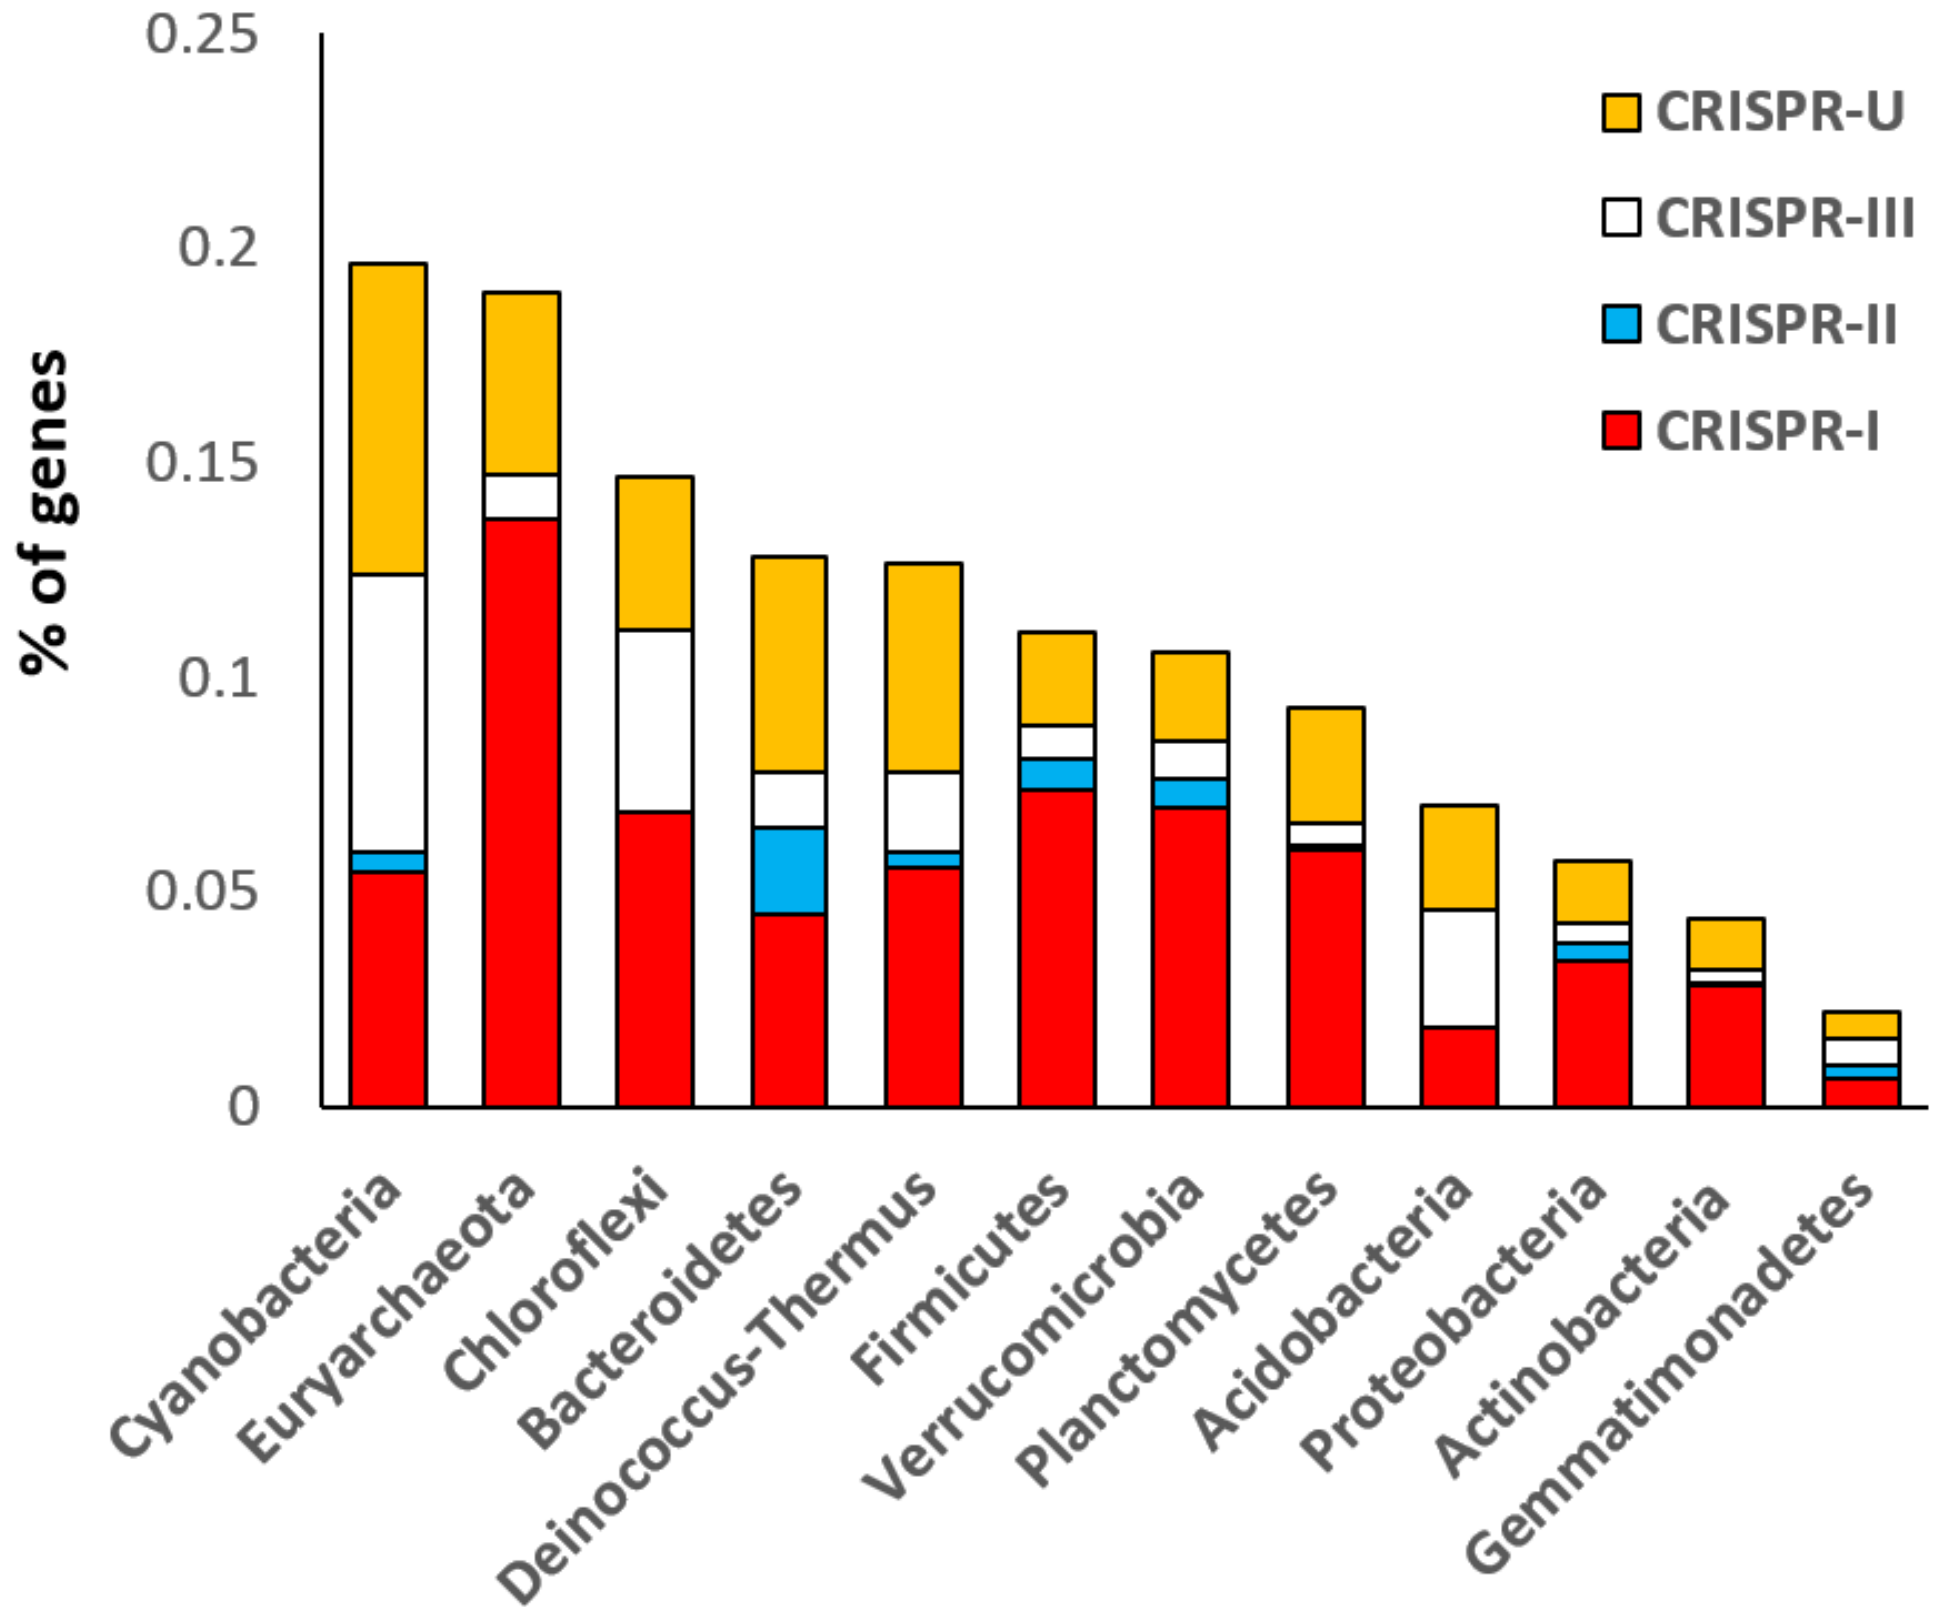

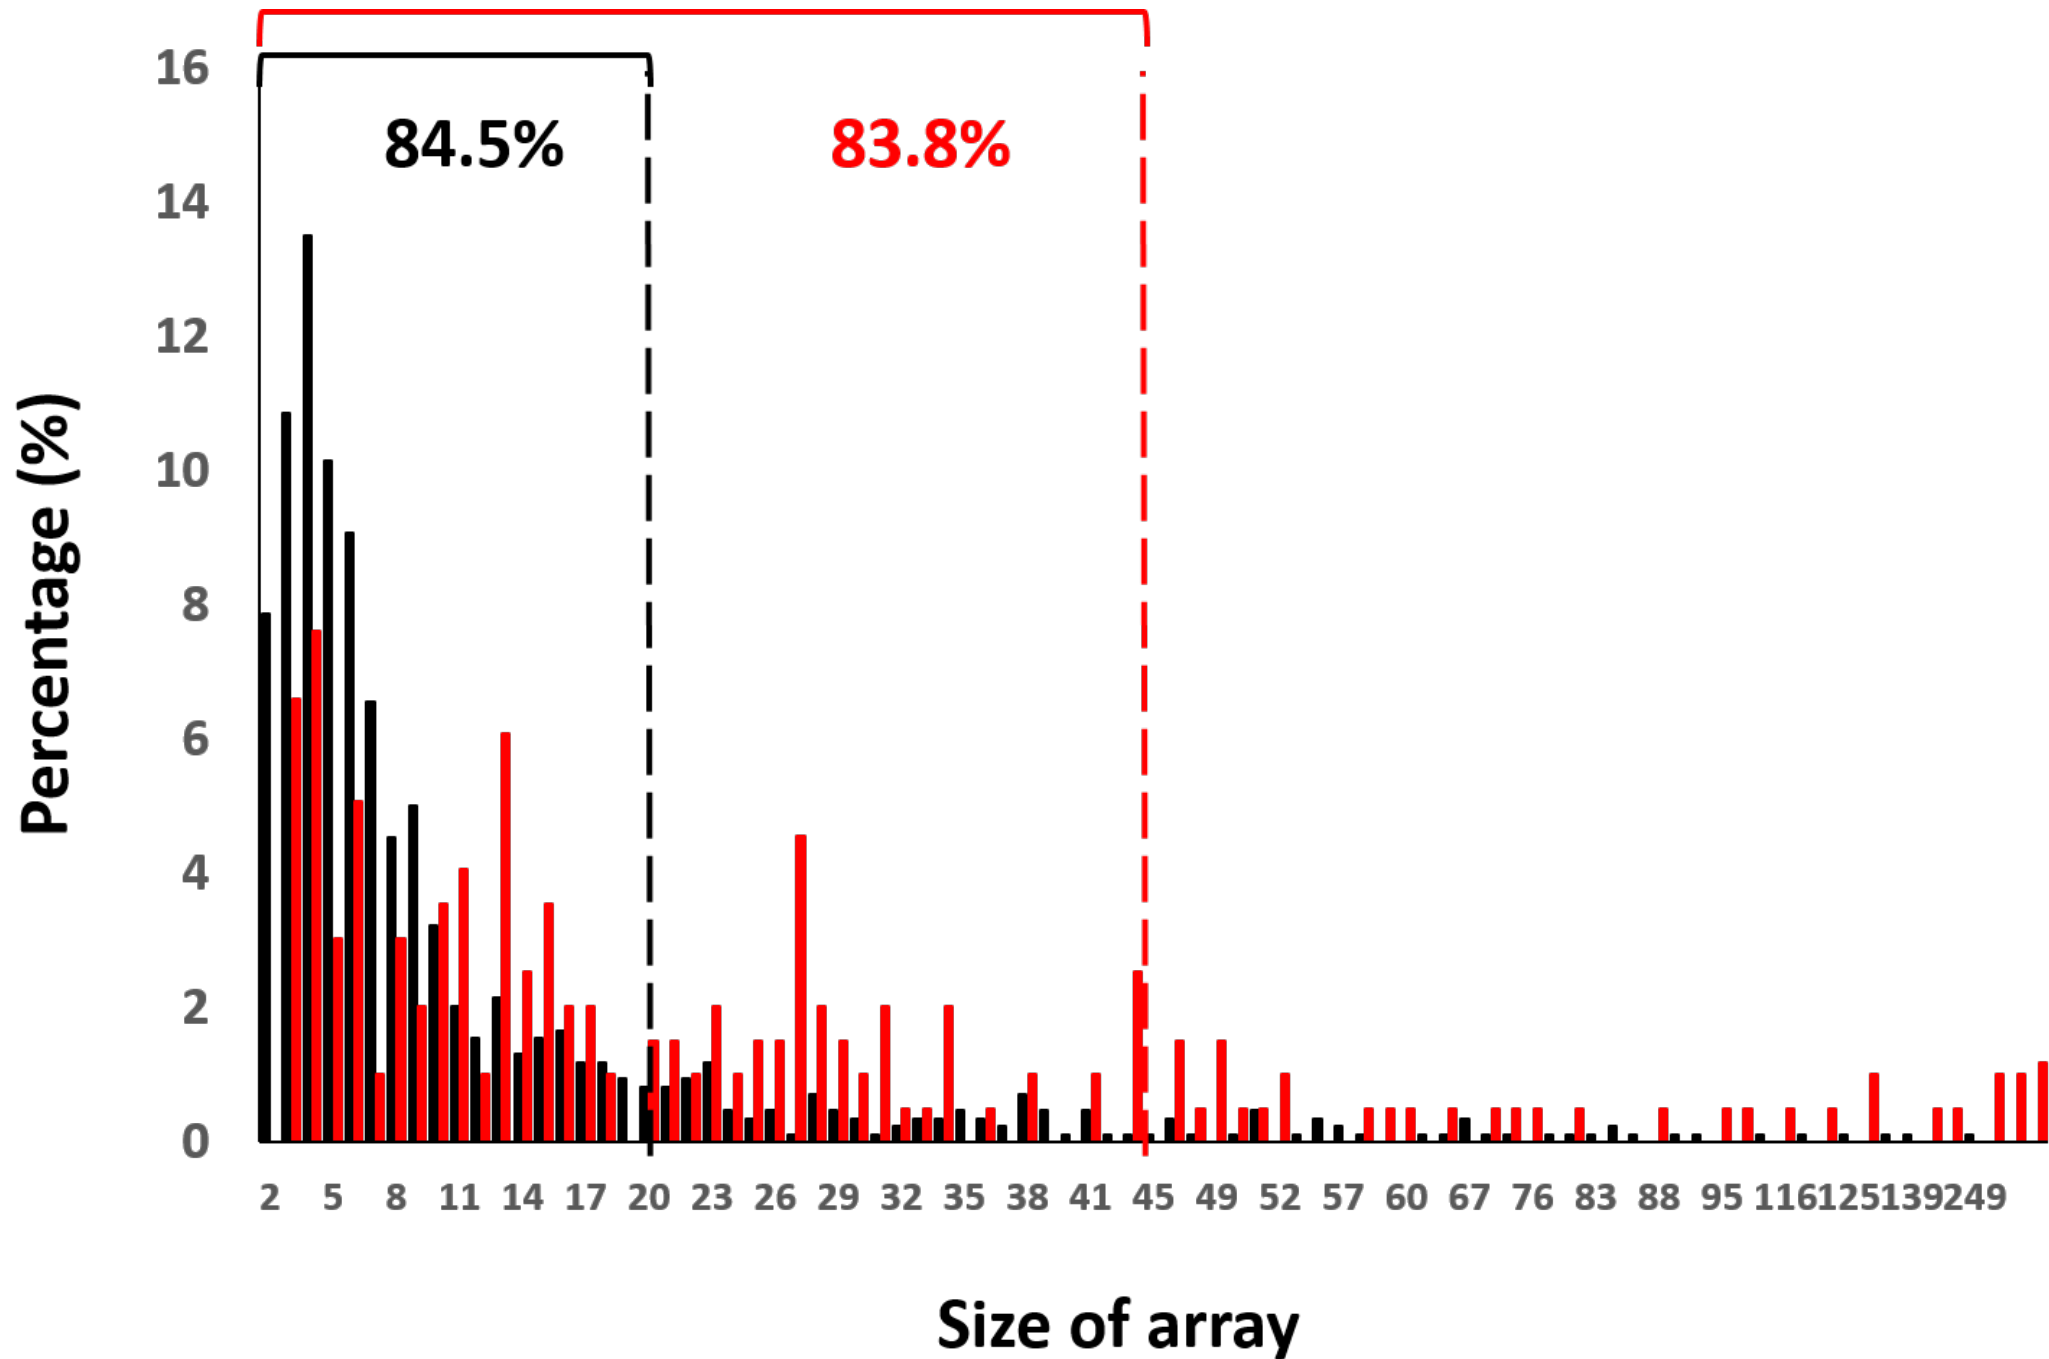



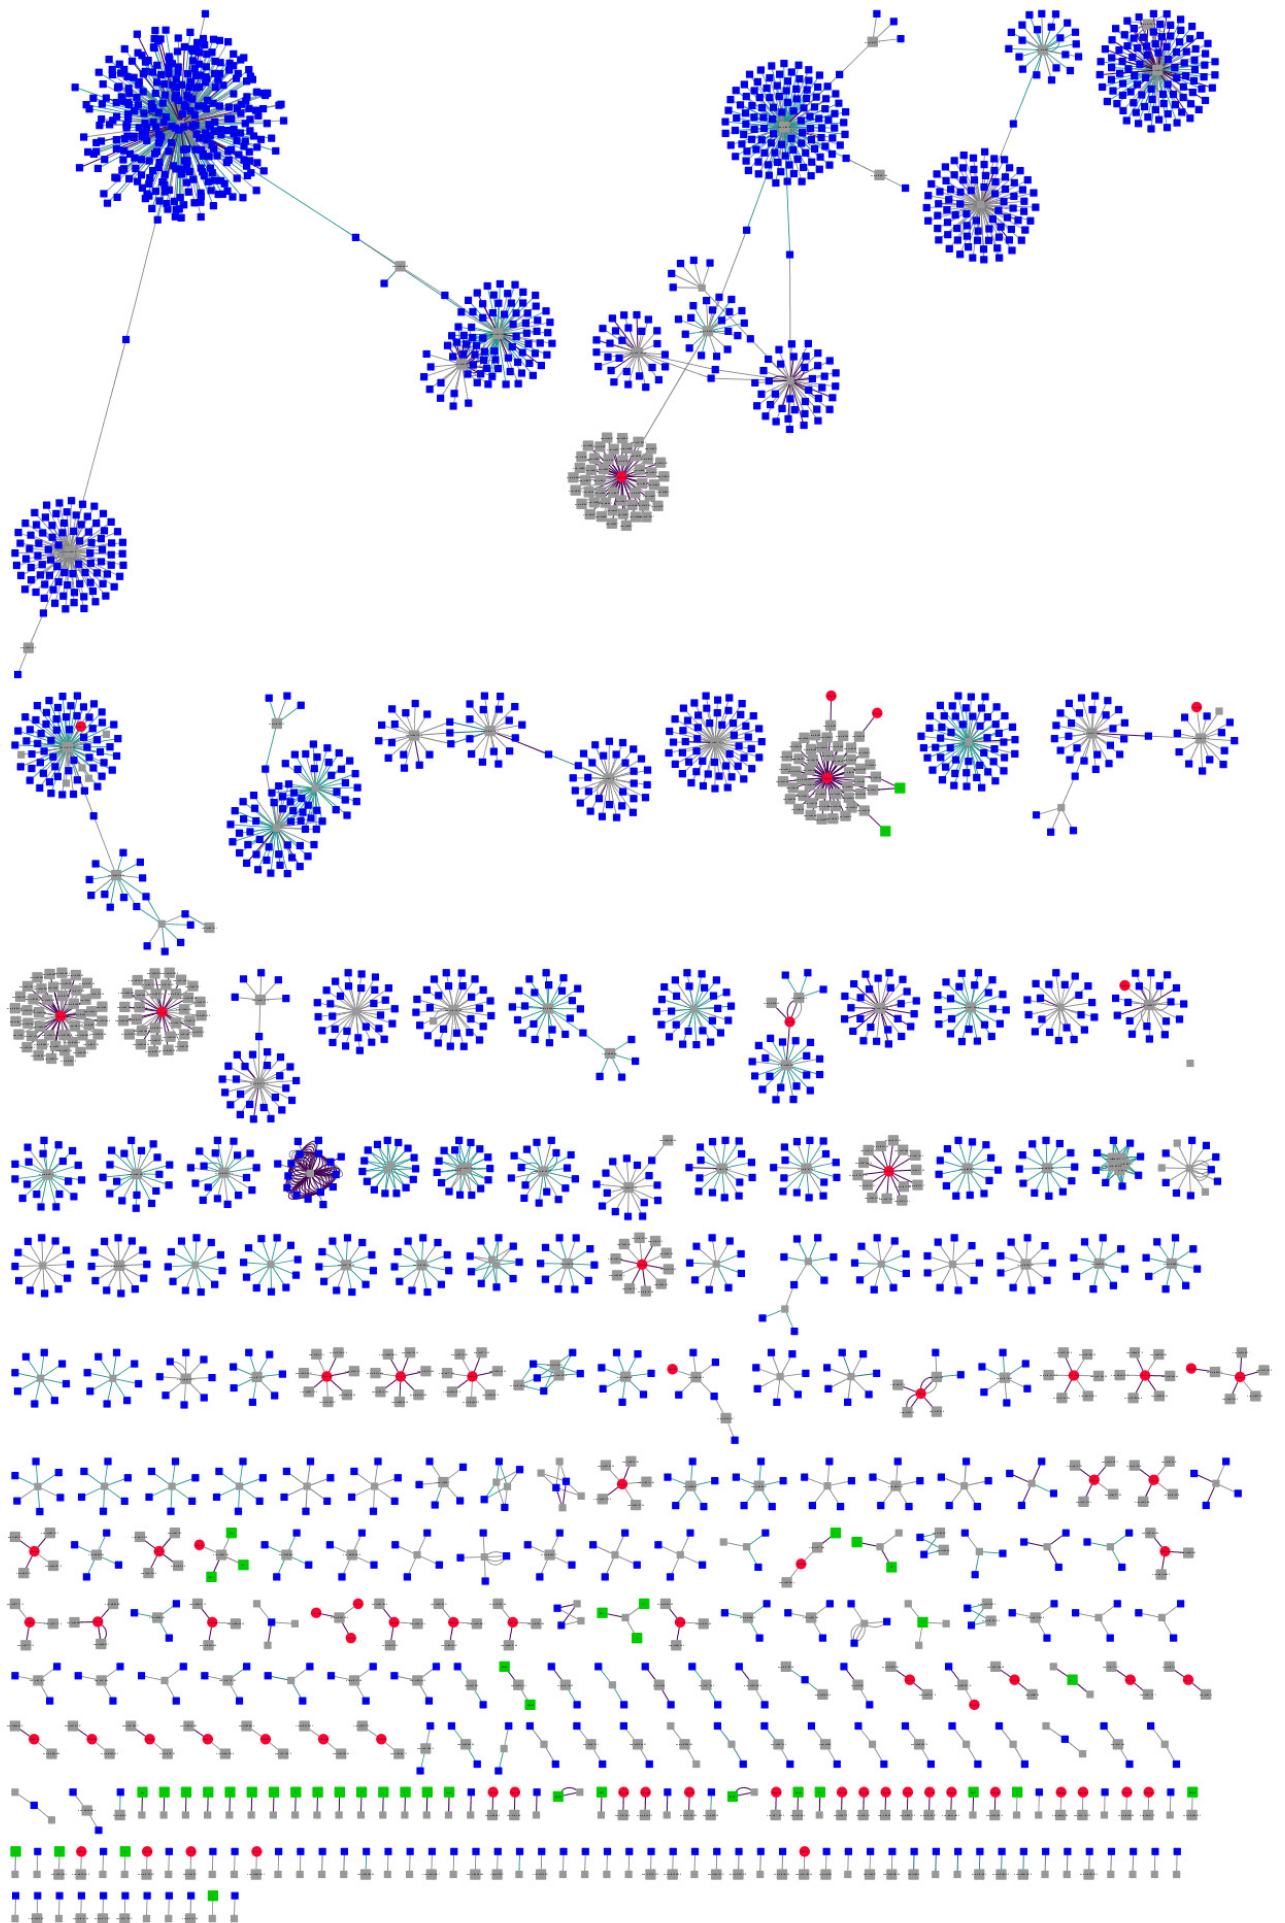



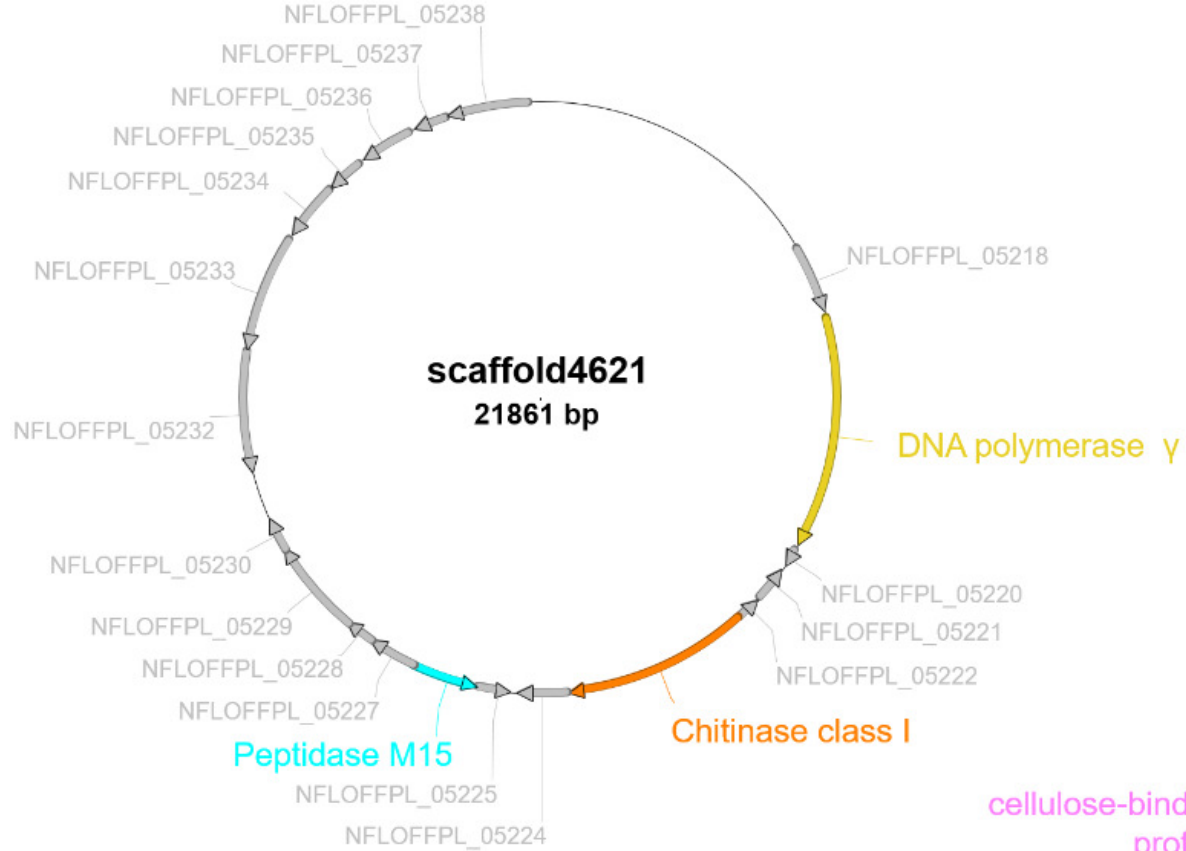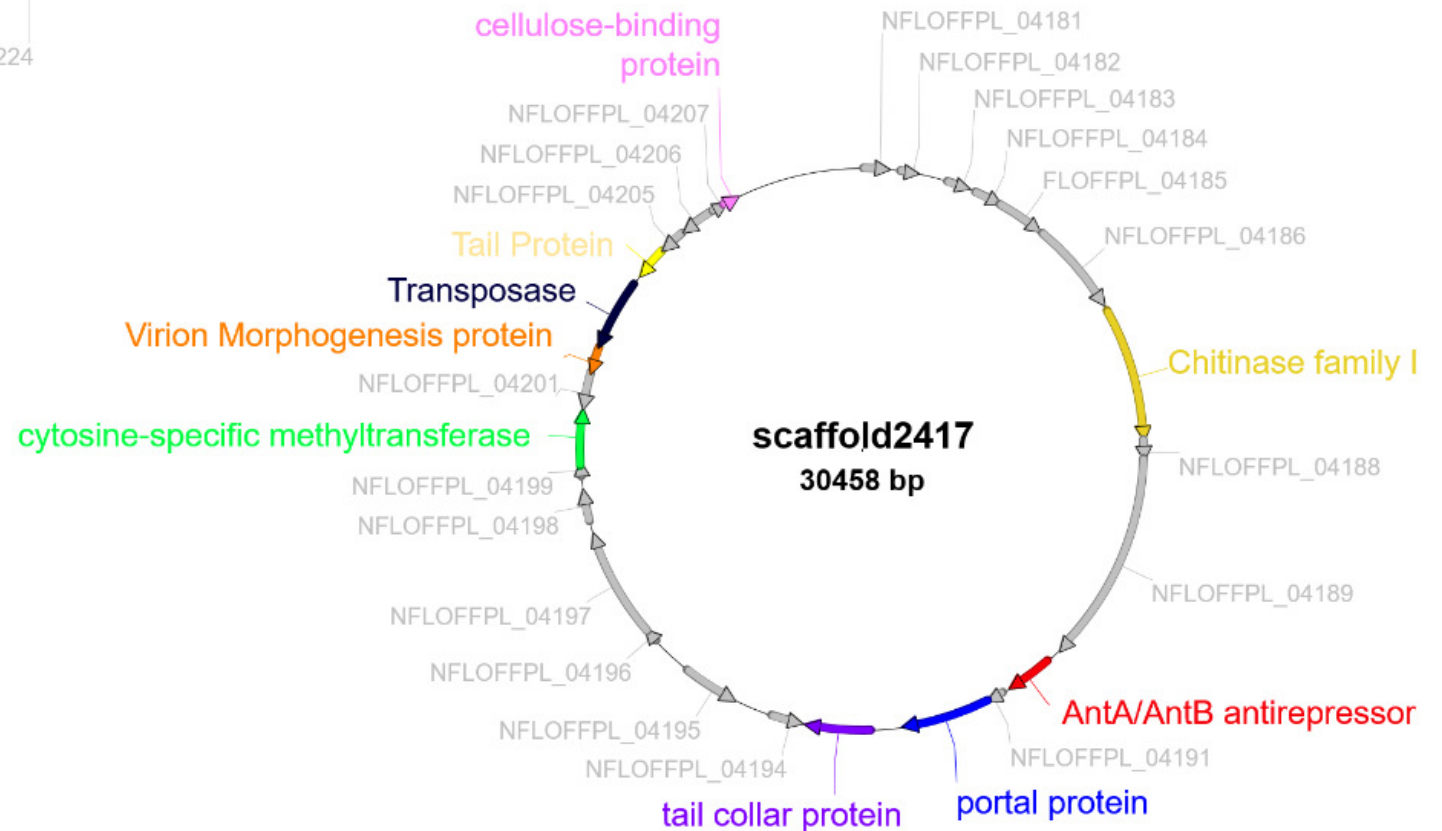

Source: https://biorxiv.org/content/biorxiv/early/2020/01/20/2020.01.17.911081.full-text.pdf
